# Supplementary material for: Raman spectroscopic identification of cookeite in the crystal-rich inclusions in spodumene from the Jiajika lithium pegmatite deposit, China, and its geological implications
Source: Copernicus journal article supplement (doi:10.5194/ejm-32-67-2020), 2020-01-16
Supplement: Supplementary file 1 [file ejm-32-67-2020-supplement.pdf]

Supplement of Eur. J. Mineral., 32, 67–75, 2020  
<https://doi.org/10.5194/ejm-32-67-2020-supplement>  
© Author(s) 2020. This work is distributed under  
the Creative Commons Attribution 4.0 License.

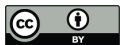

European Journal of  
Mineralogy

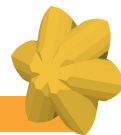

Open Access

*Supplement of*

**Raman spectroscopic identification of cookeite in the crystal-rich inclusions in spodumene from the Jiajika lithium pegmatite deposit, China, and its geological implications**

**Xin Ding et al.**

*Correspondence to:* Jiankang Li (li9968@126.com)

The copyright of individual parts of the supplement might differ from the CC BY 4.0 License.

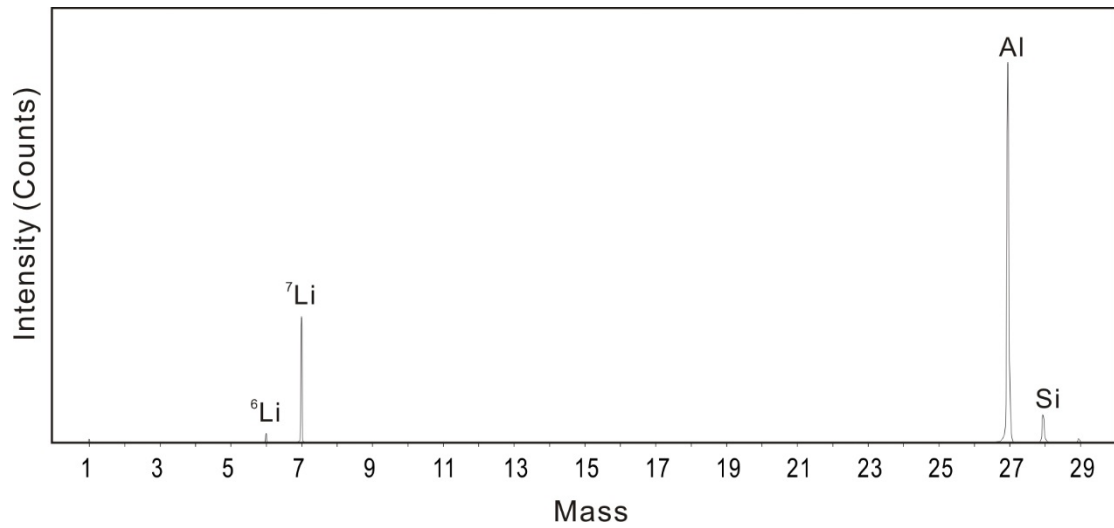

Figure S1. ToF-SIMS spectrum of one hydrous solid phase (cookeite) in one CI-hosted in spodumene from Jiajika pegmatite, marked with the elements corresponding to the peaks. There are two isotopes of lithium:  ${}^6\text{Li}$  and  ${}^7\text{Li}$ .
